# Supplementary material
Source: PubMed Central journal article supplement (PMC8922511)
Supplement: tpmd210970.SD1.pdf [file tpmd210970.SD1.pdf]

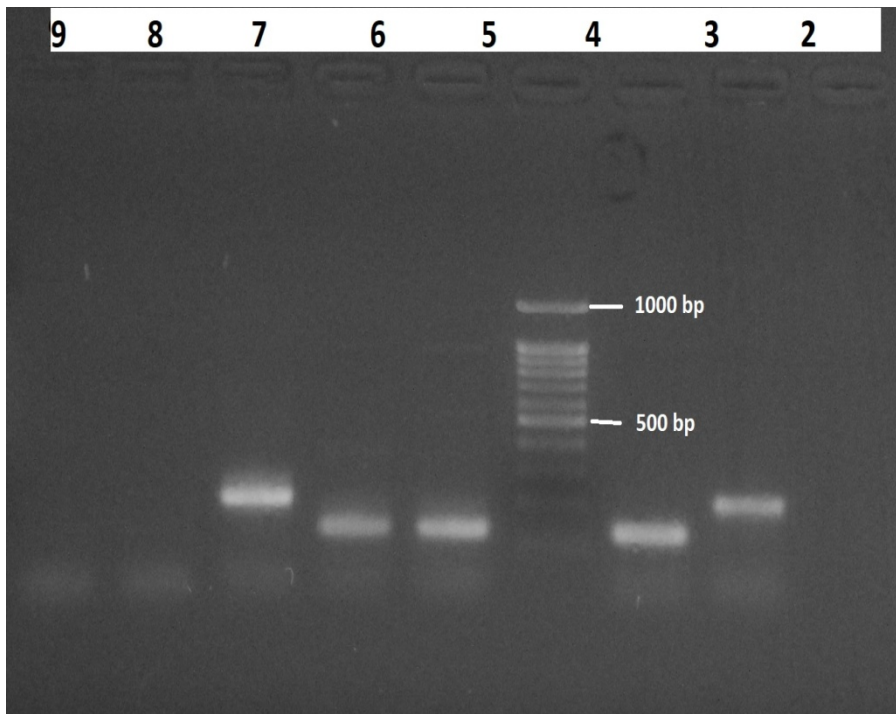

**Supplemental Fig. 1. Electrophoresis of the 18SSU rRNA gene nPCR products on a 1.5% agarose gel.**

**Lane 1:** Negative control, **Lane 2:** control positive *P. falciparum* (205bp), **Lane 3:** control positive *P. vivax* (120bp), **Lane 4:** DNA marker 100bp, **Lanes 5,6:** *P. vivax*, **Lane 7:** *P. falciparum* (205bp), **Lanes 8,9:** Negative sample.

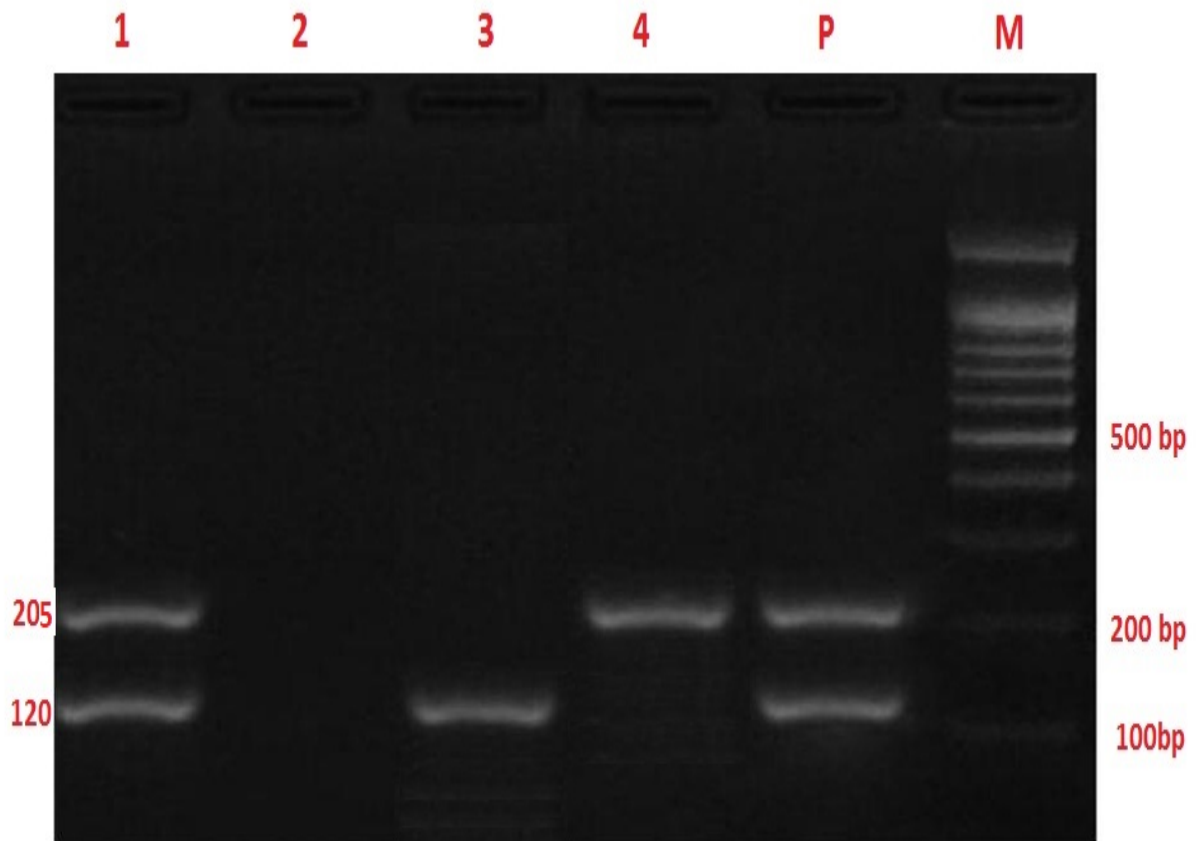

**Supplemental Fig. 2. Electrophoresis of the 18SSU rRNA gene multiplex/nested PCR products on a 1.5% agarose gel.**

**Lane 1:** Mix infection, **Lane 2:** Negative sample, **Lane 3:** *P. vivax* (120bp), **Lane 4:** *P. falciparum* (205bp), **Lane P:** control positive for mix infection with *P. falciparum* (205bp) and *P. vivax*, (120bp), **Lane M:** DNA marker 100bp
